# Supplementary material for: Carbon nanodot-induced gelation of a histidine-based amphiphile: application as a fluorescent ink, and modulation of gel stiffness
Source: Royal Society of Chemistry journal article supplement (doi:10.1039/c7cc09824c), 2018-01-01
Supplement: c7cc09824c1.pdf [file c7cc09824c1.pdf]

# **Carbon nano-dots induced gelation of a histidine based amphiphile: Application as a fluorescent Ink and modulation of Gel stiffness**

Subir Paul, Kousik Gayen, Nibedita Nandi and Arindam Banerjee\*

<sup>a</sup>Department of Biological Chemistry, Indian Association for the Cultivation of Science,

Jadavpur, Kolkata, 700032 (India)

Fax: (+ 91) 33-2473-2805,

E-mail: [bcab@iacs.res.in](mailto:bcab@iacs.res.in).

## **Experimental section:**

### **NMR experiments**

All NMR studies were carried out on Bruker DPX400 MHz and Bruker DPX500 MHz spectrometers at 300 K. Concentrations were in the range 5–10 mmol in CDCl<sub>3</sub> or DMSO-d<sub>6</sub>.

### **Mass spectrometry**

Mass spectra were recorded on a Q-Tofmicro™ (Waters Corporation) mass spectrometer by positive mode electrospray ionization process.

### **Field Emission Scanning Electron Microscopy (FE-SEM) study**

FE-SEM experiments were performed by placing a small portion of gel sample on a microscope cover glass. Then, these samples were dried first in air and then in vacuum and coated with platinum for 90 seconds at 10 kV voltages and 10 μA current. The average thickness of the coating layer of platinum was 3 to 4 nm. After that micrographs were taken by using a Jeol Scanning Microscope model JSM-6700F.

### **Fourier Transform Infrared (FTIR) study**

All FT-IR spectra were recorded by using the KBr pellet technique in a Nicolet 380 FT-IR spectrophotometer (Thermo Scientific).

### **MALDI-TOF:**

MALDI-TOF MS analysis has been performed by using Applied Biosystems MALDI TOF/TOF Analyzer in dihydroxybenzoic acid as a matrix.

### UV/Vis spectroscopy

UV/Vis absorption spectra were recorded on a Hewlett-Packard (model 8453) UV/Vis spectrophotometer (Varian Carry 50.bio).

### Rheology study

The rheological measurements of the hydrogels were studied under dynamic and steady shear measurement at room temperature (25 °C) in a parallel-plate geometry (25 mm diameter, 1 mm gap). Rheological experiments were carried out using an Anton Paar modular compact rheometer (MCR 102). Measurements of the shear moduli of the hydrogels were performed at room temperature using parallel-plate geometry (PP-25 mm, gap 0.5 mm).

### PL Spectroscopy

Fluorescence studies of the sample were carried out in a HORIBA Jobin Y von Fluorolog 3 Spectrometer instrument.

### Absolute quantam yield study

The absolute quantam yield of xerogel was measured in a calibrated integrating sphere method in a PTIQM400 spectrometer.

### Synthetic Procedure:

**Synthesis of mono Boc protected ethylenediamine:** The synthetic procedure has been described in *J. Mat. Chem. B.*, **2014**, 2, 8528-8537.

**Synthesis of 1 [CH<sub>3</sub>-(CH<sub>2</sub>)<sub>12</sub>-CONH-(CH<sub>2</sub>)<sub>2</sub>-NHCO-O(CH<sub>3</sub>)<sub>3</sub>]:** Myristic acid (2.28g, 10mmol) was dissolved in 10 ml DMF in a 250 ml round bottom flask in an ice water bath. 1.35g (10mmol) HOBt was added to it. Then mono Boc protected ethylenediamine (1.76g, 11 mmol dissolved in 25 ml ethyl acetate) followed by DCC (2.27g, 11mmol) was added to the reaction mixture. The reaction mixture was then allowed to come to room temperature and stirred for 48h. The reaction mixture was diluted with ethyl acetate and filtered to separate N, N- dicyclohexyl urea (DCU). The organic layer was washed with 1(N)HCl (3 × 30 ml), brine (1 × 30 ml), saturated sodium carbonate (3 × 30 ml) and brine (2 × 30 ml), dried over anhydrous Na<sub>2</sub>SO<sub>4</sub> and evaporated in vacuum. A white material was obtained.

Yield: 2.96g (8 mmol, 80%)

$^1\text{H}$  NMR (400 MHz,  $\text{CDCl}_3$ , 25 °C):  $\delta$  6.27 (1H, br, NH), 4.99 (1H, br, NH), 3.35-3.38 (2H, m,  $\alpha$ - $\text{CH}_2$  of ethylenediamine), 3.28-3.29 (2H, m,  $\beta$ - $\text{CH}_2$  ethylenediamine), 2.18 (2H, t,  $J=8\text{Hz}$ ), 1.46 (9H, s, Boc- $\text{CH}_3$ ), 1.09-1.29 (24H, m, chain  $-\text{CH}_2$ ), 0.90 (3H, t,  $\text{CH}_3$ ,  $J=6.5\text{ Hz}$ ).  $^{13}\text{C}$  NMR (100 MHz,  $\text{CDCl}_3$ ):  $\delta$  174.20, 79.90, 50.98, 40.93, 40.43, 36.94, 34.02, 32.06, 29.82, 29.79, 29.77, 29.63, 29.49, 29.46, 28.50, 25.85, 25.04, 22.83, 14.24. HRMS (m/z): Calculated for  $\text{C}_{21}\text{H}_{42}\text{N}_2\text{O}_3$ : 370.57 Found: 393.20 (M+Na) $^+$ .

**Synthesis of 2[ $\text{CH}_3-(\text{CH}_2)_{12}-\text{CONH}-(\text{CH}_2)_2-\text{NH}_2$ ]:** To 1.85 g (5 mmol) of **1**, 5 ml of 98% formic acid was added and the removal of the Boc group was monitored by TLC. After 6 h, formic acid was removed under vacuum. The residue was taken in water (8 ml) and pH of the aqueous solution was then adjusted to 8.0 with 30% aqueous  $\text{NH}_3$ . The aqueous portion was evaporated in a vacuum. A white material was obtained, purified using basic alumina in chloroform and methanol (9:1) as eluent.

Yield: 1.08g (4 mmol, 80%)

$^1\text{H}$  NMR (400 MHz  $\text{DMSO}-d_6$ , 25 °C):  $\delta$  7.69 (1H, br, NH), 2.98-3.04 (2H, m,  $\beta$ - $\text{CH}_2$  of ethylenediamine), 2.49-2.50 (2H, m,  $\text{NH}_2$ ), 2.02 (2H, t,  $J=7.6\text{Hz}$ ), 1.22-1.47 (22H, m, chain  $\text{CH}_2$ ), 0.84 (3H, t,  $J=6\text{Hz}$ ).  $^{13}\text{C}$  NMR (100 MHz,  $\text{DMSO}-d_6$ ):  $\delta$  172.07, 42.21, 41.39, 35.40, 31.23, 28.95, 28.88, 28.72, 28.63, 25.24, 22.02, 13.88. HRMS (m/z): Calculated for  $\text{C}_{16}\text{H}_{34}\text{N}_2\text{O}$ : 270.27 Found: 271 (M+H) $^+$ .

**Synthesis of di-Boc Histidine:** The synthetic procedure has been described in Mirzahassemi et. al. ARKIVOC, 2014(VI), 1-9.

**Synthesis of 3[ $\text{CH}_3-(\text{CH}_2)_{12}-\text{CONH}-(\text{CH}_2)_2-\text{NHCO}-\text{CH}_2(\text{CH}_2-\text{C}_3\text{H}_2\text{N}_2)-\text{NHCO}-\text{O}(\text{CH}_3)_3$ ]:** 2 (2.7 g, 10 mmol) was dissolved in 15 ml DMF in a 250 ml round bottom flask in an ice water bath. 1.35g (10 mmol) HOBt was added to it. The diboc protected histidine (3.91g, 11 mmol) was dissolved in 25 ml ethyl acetate and then DCC (2.27g, 11 mmol) was added to the reaction mixture. The reaction mixture was allowed to come to room temperature and stirred for 48h. The reaction mixture was diluted with ethyl acetate and filtered to separate N, N-dicyclohexyl urea (DCU). The organic layer was washed with 1(N)HCl (3  $\times$  30 ml), brine (1  $\times$  30 ml), saturated sodium carbonate (3  $\times$  30 ml) and brine (2  $\times$  30 ml), dried over anhydrous  $\text{Na}_2\text{SO}_4$  and evaporated in vacuum. A white material was obtained, purified using basic alumina in chloroform and methanol (9:1) as eluent.

Yield: 3.94g (6.5 mmol, 65%)

$^1\text{H}$  NMR (400 MHz,  $\text{CDCl}_3$ , 25 °C):  $\delta$  7.98 (1H, s, imidazole CH), 7.18 (1H, s, imidazole proton), 6.82 (1H, br, NH), 6.60 (1H, br, NH), 5.96 (1H, br, NH), 4.33-4.35 (1H, m, CH of His), 3.32-3.38 (4H, m,  $\text{CH}_2$  of ethylenediamine), 2.94-2.99 (2H, m,  $\text{CH}_2$  of His), 2.14 (2H, t,  $J=7.6\text{Hz}$ ), 1.32-1.64 (22H, m, chain  $\text{CH}_2$ ), 1.24 (18H, s, Boc- $\text{CH}_3$ ), 0.87 (3H, t,  $J=6.4\text{Hz}$ ).  $^{13}\text{C}$  NMR (100 MHz,  $\text{CDCl}_3$ ):  $\delta$  173.96, 172.35, 146.92, 138.95, 136.88, 115.11, 86.01, 80.33, 55.90, 54.54, 39.64,

36.85, 35.07, 34.10, 32.05, 30.51, 29.78, 29.65, 29.51, 28.48, 28.11, 28.02, 25.86, 25.61, 25.08, 24.83, 22.82, 14.24. HRMS (m/z): Calculated for  $C_{32}H_{57}N_5O_2$ : 607.43 Found: 630.16(M+Na)<sup>+</sup>, .

**Synthesis of P1[CH<sub>3</sub>-(CH<sub>2</sub>)<sub>12</sub>-CONH-(CH<sub>2</sub>)<sub>2</sub>-NHCO-CH<sub>2</sub>(CH<sub>2</sub>-C<sub>3</sub>H<sub>2</sub>N<sub>2</sub>)-NH<sub>2</sub>]:** To 3.03 g (5 mmol) of **3**, 8 ml of 98% formic acid was added and the removal of the Boc group was monitored by TLC. After 6 h, formic acid was removed under vacuum. The residue was taken in water (8 ml) and pH of the aqueous solution was then adjusted to 8.0 with 30% aqueous NH<sub>3</sub>. The aqueous portion was evaporated in a vacuum. A white material was obtained, purified using basic alumina in chloroform and methanol (9:1) as eluent.

Yield: 1.62 g (4 mmol, 80%)

<sup>1</sup>H NMR (400 MHz, DMSO-d<sub>6</sub>, 25 °C): δ 11.82 (1H, br, NH of imidazole), 7.91 (1H, s, imidazole CH), 7.85 (1H, br, NH), 7.50 (1H, s, imidazole CH), 6.79 (1H, br, NH), 4.43-4.48 (1H, α-CH of His), 3.05-3.10 (4H, m, CH<sub>2</sub> of ethylenediamine), 2.81-2.84 (2H, d, β-CH<sub>2</sub> of His), 2.02 (2H, t, J=7.2 Hz), 1.45-1.47 (2H, br, NH<sub>2</sub>), 1.21-1.25 (22H, m, chain CH<sub>2</sub>), 0.84 (3H, t, J=6.4 Hz). <sup>13</sup>C NMR (100 MHz, DMSO-d<sub>6</sub>): δ 174.75, 172.67, 161.13, 134.81, 55.24, 38.88, 38.41, 38.39, 35.56, 31.36, 29.11, 29.09, 28.99, 28.86, 28.76, 25.30, 22.16, 14.01. HRMS (m/z): Calculated for  $C_{22}H_{41}N_5O_2$ : 407.33 Found: 408.14(M+H)<sup>+</sup>, 430.15(M+Na)<sup>+</sup>.

**Synthesis of Boc-Phe-OH:** The synthetic procedure has been described in *Chem. Commun.*, 2016, 52, 5045-5048.

**Synthesis of 4[CH<sub>3</sub>-(CH<sub>2</sub>)<sub>12</sub>-CONH-(CH<sub>2</sub>)<sub>2</sub>-NHCO-CH(CH<sub>2</sub>-C<sub>6</sub>H<sub>5</sub>)-NHCO-O(CH<sub>3</sub>)<sub>3</sub>]**2**:** (2.7 g, 10 mmol) was dissolved in 15 ml DMF in a 250 ml round bottom flask in an ice water bath. 1.35 g (10 mmol) HOBt was added to it. Boc protected phenyl alanine (2.38 g, 9 mmol) was dissolved in 25 ml ethyl acetate and then DCC (2.27 g, 11 mmol) was added to the reaction mixture. The reaction mixture was then allowed to come to room temperature and stirred for 48 h. The reaction mixture was diluted with ethyl acetate and it was filtered to separate N, N-dicyclohexyl urea (DCU). The organic layer was washed with 1(N)HCl (3 × 30 ml), brine (1 × 30 ml), saturated sodium carbonate (3 × 30 ml) and brine (2 × 30 ml), dried over anhydrous Na<sub>2</sub>SO<sub>4</sub> and evaporated in vacuum. A white material was obtained, purified using basic alumina in ethyl acetate and petroleum ether (2:8) as eluent.

Yield: 3.62 g (6.3 mmol, 70%)

<sup>1</sup>H NMR (500 MHz, CDCl<sub>3</sub>, 25 °C): δ 7.18-7.30 (5H, m, CH of Phe), 6.56 (1H, br, NH), 6.27 (1H, br, NH), 5.17 (1H, br, NH), 4.29-4.31 (1H, m, α-CH of Phe), 3.01-3.29 (6H, m, CH<sub>2</sub> of ethylenediamine and β-CH<sub>2</sub> of Phe), 2.12 (3H, t, J=8 Hz), 1.24-1.57 (22H, m, chain CH<sub>2</sub>), 0.88 (3H, t, J=7.5 Hz). <sup>13</sup>C NMR (125 MHz, CDCl<sub>3</sub>): δ 174.72, 172.76, 155.70, 136.75, 129.57, 129.43, 128.83, 128.67, 128.58, 127.17, 127.11, 126.79, 126.20, 117.61, 111.24, 39.93, 39.79,

38.73, 36.77, 32.06, 29.82, 29.78, 29.64, 29.47, 28.41, 25.81, 22.82, 14.22. HRMS (m/z): Calculated for  $C_{30}H_{51}N_3O_4$ : 517.74 Found: 540.39(M+Na)<sup>+</sup>.

**Synthesis of P2[CH<sub>3</sub>-(CH<sub>2</sub>)<sub>12</sub>-CONH-(CH<sub>2</sub>)<sub>2</sub>-NHCO-CH(CH<sub>2</sub>-C<sub>6</sub>H<sub>5</sub>)-NH<sub>2</sub>]:** To 2.58 g (5 mmol) of **4**, 8ml of 98% formic acid was added and the removal of the Boc group was monitored by TLC. After 6 h, formic acid was removed under vacuum. The residue was taken in water (8 ml) and pH of the aqueous solution was then adjusted to 8.0 with 30% aqueous NH<sub>3</sub>. The aqueous portion was evaporated in a vacuum. A white material was obtained, purified using basic alumina in chloroform and methanol (9:1) as eluent.

Yield: 1.67g (4 mmol, 80%)

<sup>1</sup>H NMR (500MHz, DMSO-d<sub>6</sub>, 25 °C): δ 7.88(1H, br, NH), 7.74(1H, br, NH), 7.18-7.28(5H, m, CH of Phe), 4.50-4.51(1H, m, α-CH of Phe), 2.89-3.17(6H, m, CH<sub>2</sub> of ethylenediamine and β-CH<sub>2</sub> of Phe), 2.02(3H, t, J=7.5 Hz), 1.33(2H, br, NH<sub>2</sub>), 1.22-1.33(22H, m, chain CH<sub>2</sub>), 0.83-0.85(3H, m, J=6Hz). <sup>13</sup>C NMR (125 MHz, DMSO-d<sub>6</sub>): δ 174.43, 172.27, 170.64, 160.70, 138.68, 129.15, 129.04, 127.99, 126.21, 125.98, 56.28, 52.51, 41.02, 40.09, 38.45, 38.27, 38.23, 38.00, 37.79, 35.40, 31.18, 28.94, 28.91, 28.81, 28.70, 28.58, 25.11, 21.98, 13.83. HRMS (m/z): Calculated for C<sub>25</sub>H<sub>43</sub>N<sub>3</sub>O<sub>2</sub>: 417.63 Found: 418.62(M+H)<sup>+</sup>, 440.62(M+Na)<sup>+</sup>.

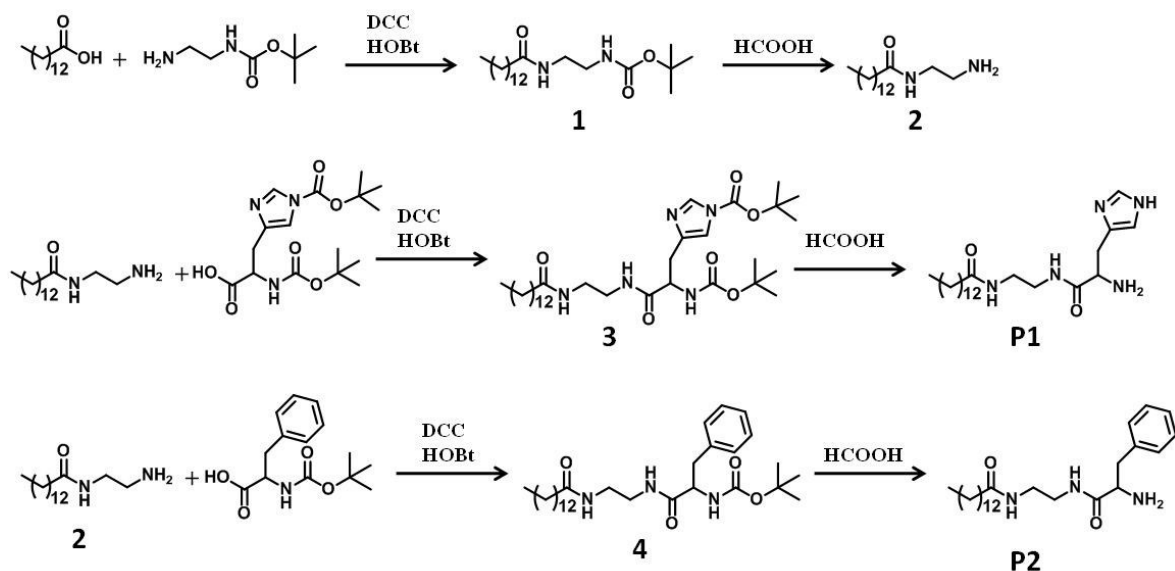

**Scheme 1:** Synthetic scheme for molecules **P1** and **P2**.

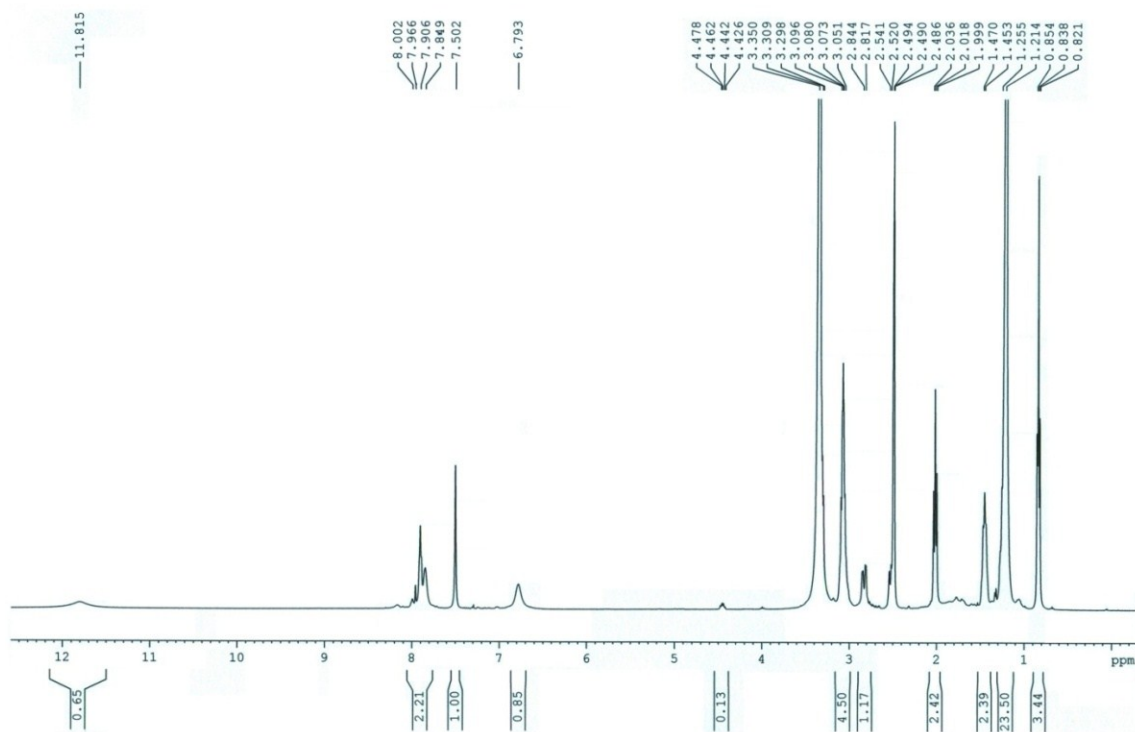

**Fig. S1** 400 MHz  $^1\text{H}$  NMR spectrum of **P1** in  $\text{DMSO-d}_6$ .

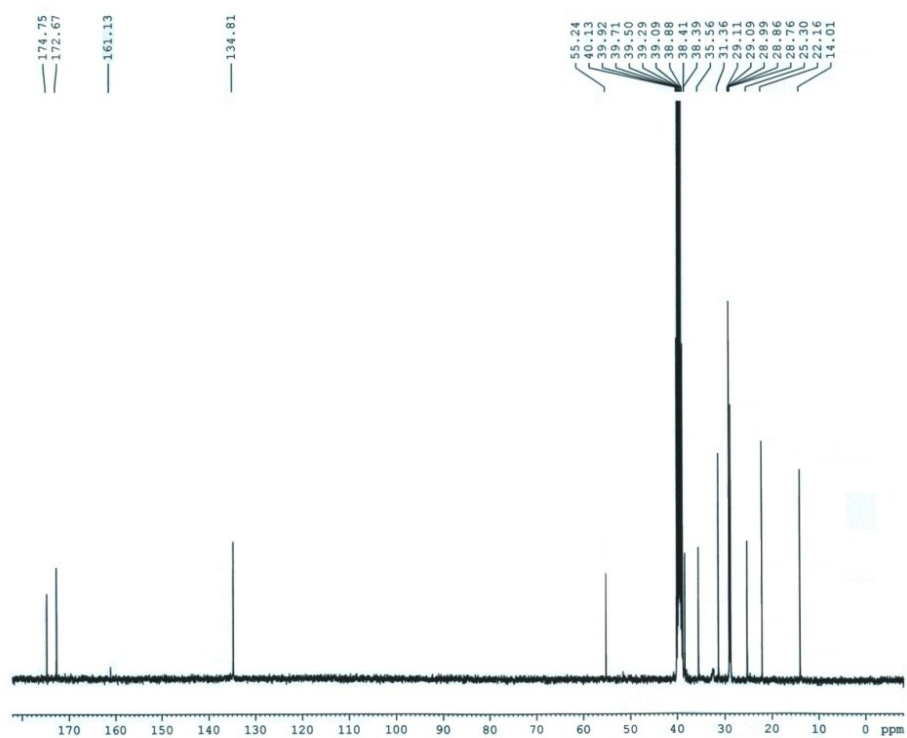

**Fig.**

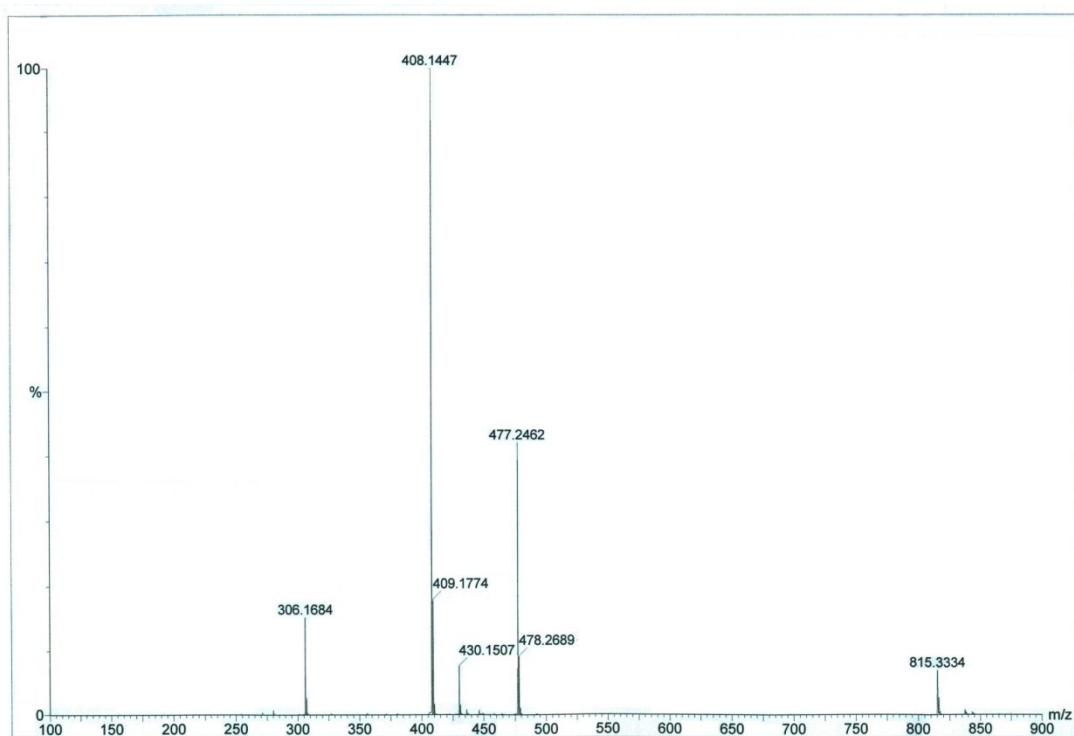

**S2100 MHz  $^{13}\text{C}$  NMR spectrum of **P1** in  $\text{DMSO-d}_6$ .**

**Fig. S3** HRMS spectrum of **P1**.

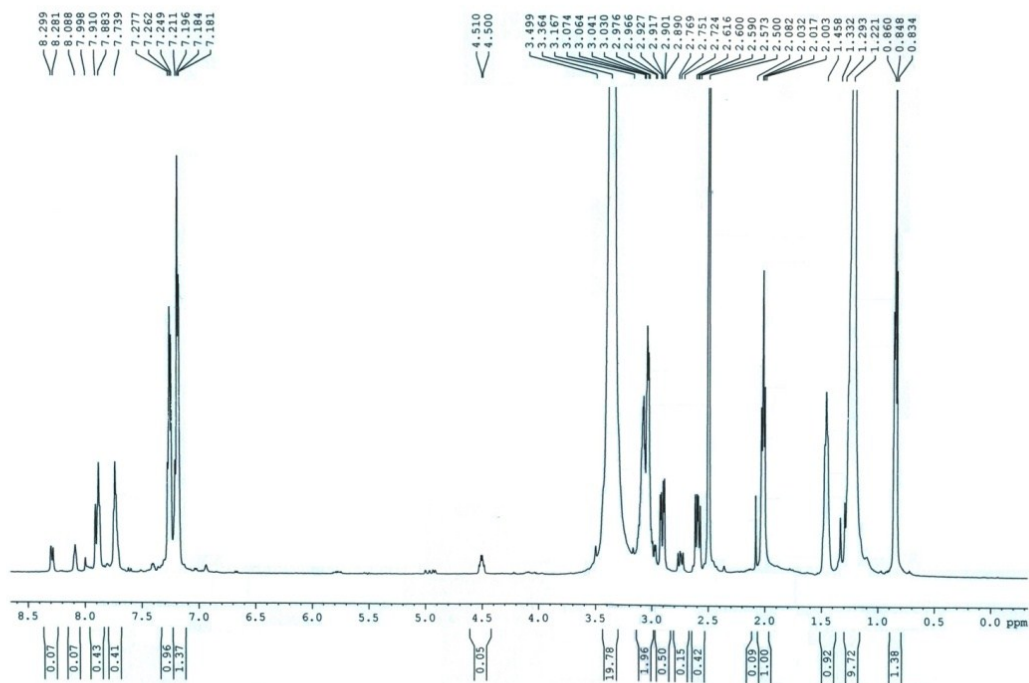

**Fig.S4** 500 MHz <sup>1</sup>H NMR spectrum of **P2** in DMSO-d<sub>6</sub>.

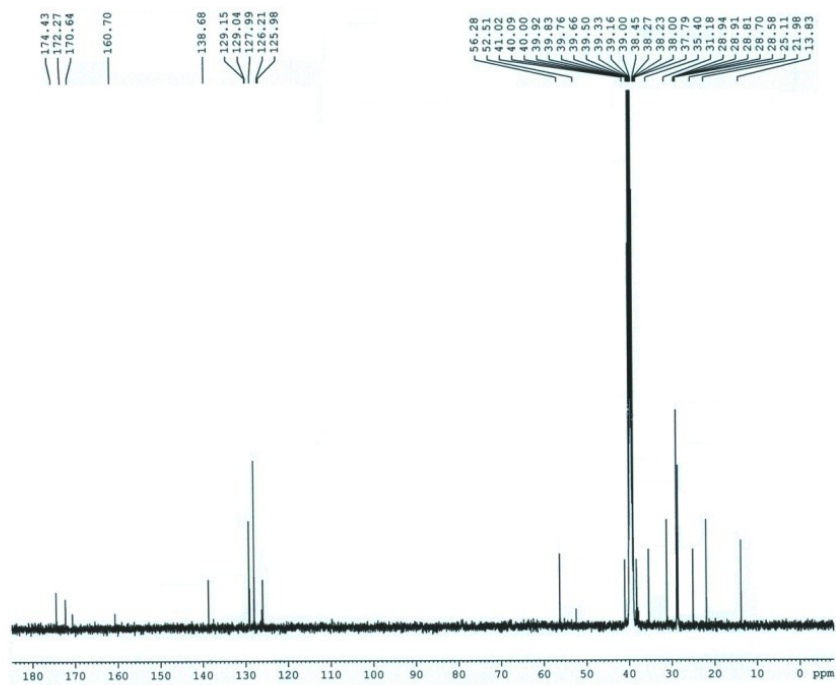



**Fig. S5** 125 MHz  $^{13}\text{C}$  NMR spectrum of **P2** in DMSO- $\text{d}_6$ .

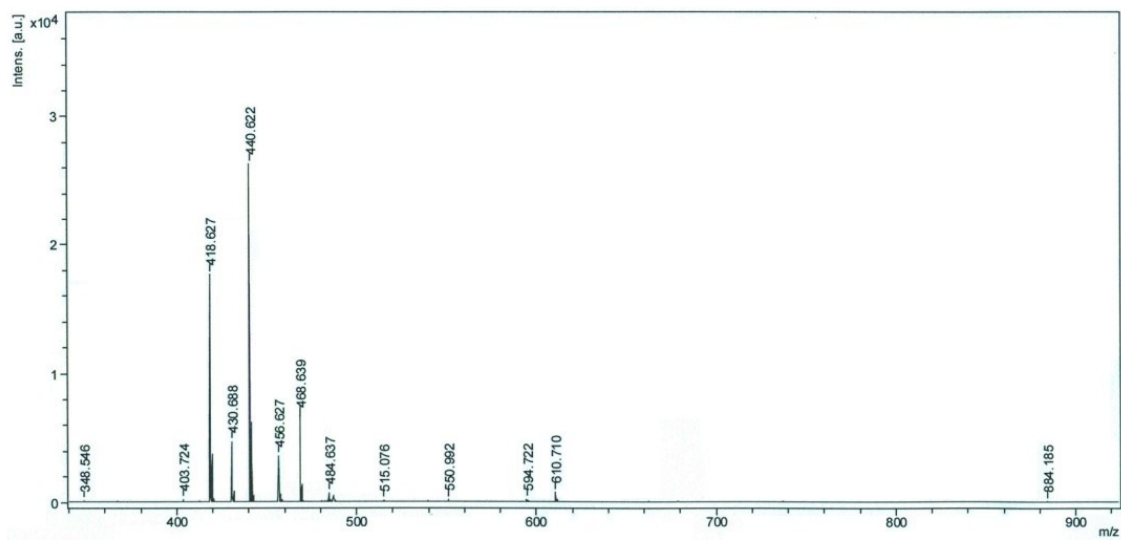

**Fig. S6** MALDI-TOF spectrum of **P2**.

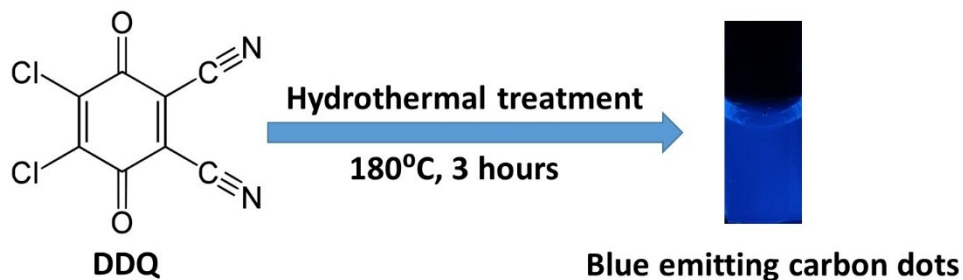

**Fig. S7** Synthetic scheme for the preparation of blue emitting carbon dots (at 365 nm) upon hydrothermal treatment of 2,3-Dichloro-5,6-dicyano-1,4-benzoquinone (DDQ).

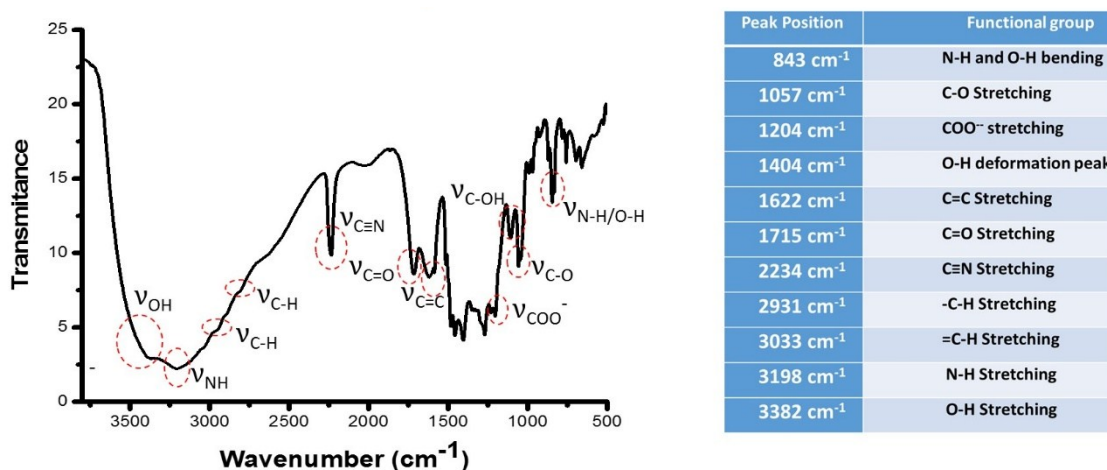

**Fig. S8** FTIR spectra of C-dots and their functional group assignment shown in a tabulated form.

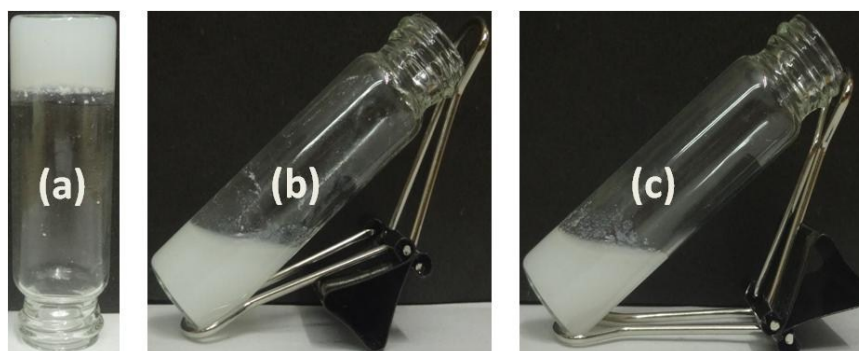

**Fig. S9** Photographs of (a) **P1** and benzenetricarboxylic acid triggered the hydrogelation in mili-Q water, (b) Insoluble aggregate of **P1** and TREN (c) Insoluble aggregate of **P1** and catichol.

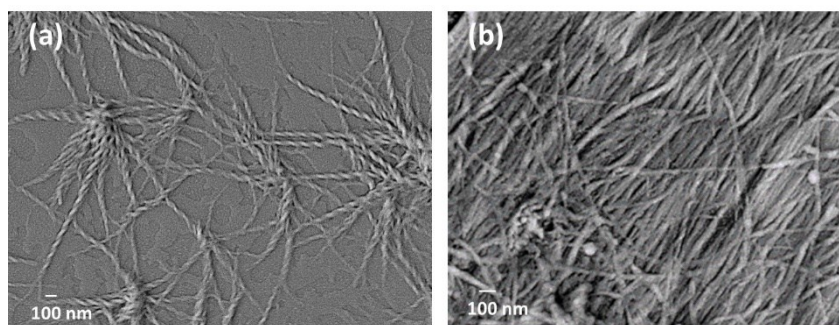

**Fig. S10** FE-SEM images of (a) **P1** aggregate (in water) and (b) **P1-C** dots composite hydrogel.

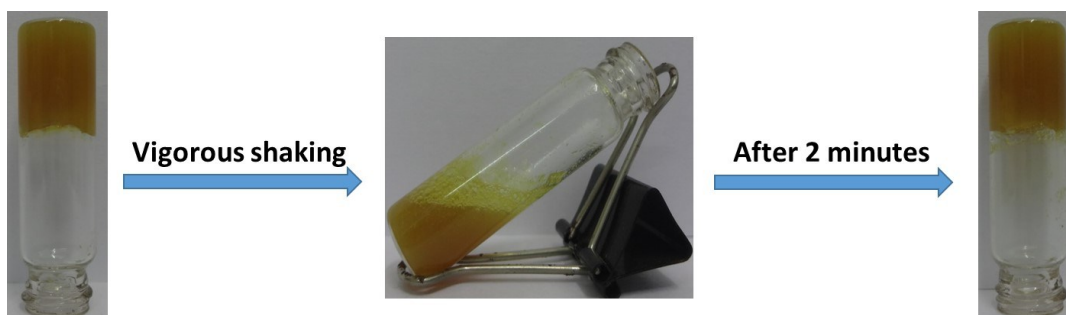

**Fig. S11** Macroscopic illustration of the thixotropic nature of the C-dots hydrogel.

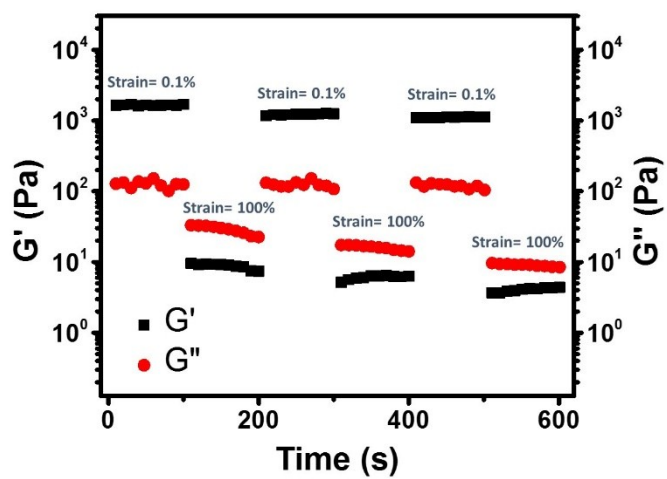

**Fig. S12** Time dependent step-strain rheological analysis of the C-dotshydrogel (amphiphile P1:C dots = 2:1) at a fixed angular frequency of 1 rad/s (25 °C).

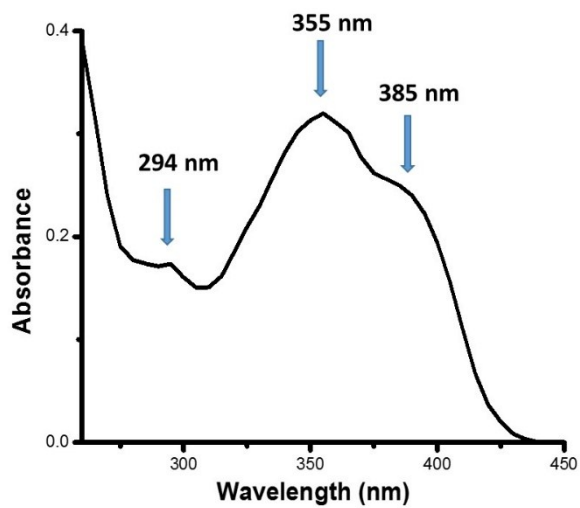

**Fig. S13** UV-Visible absorption spectrum of C-dots in water.

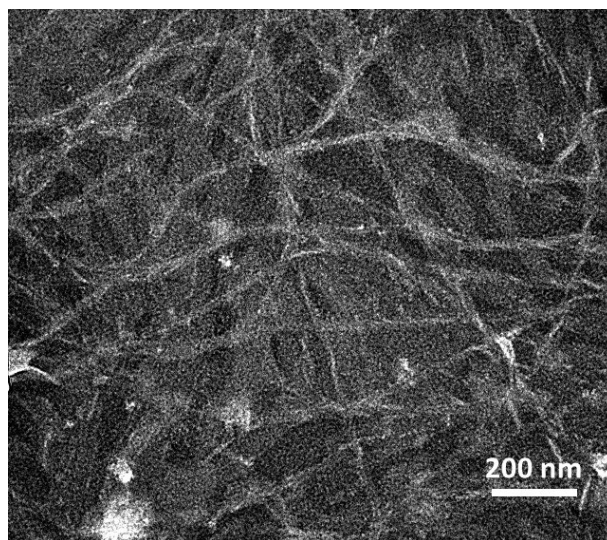

**Fig. S14** FEG-TEM image of the amphiphile P1

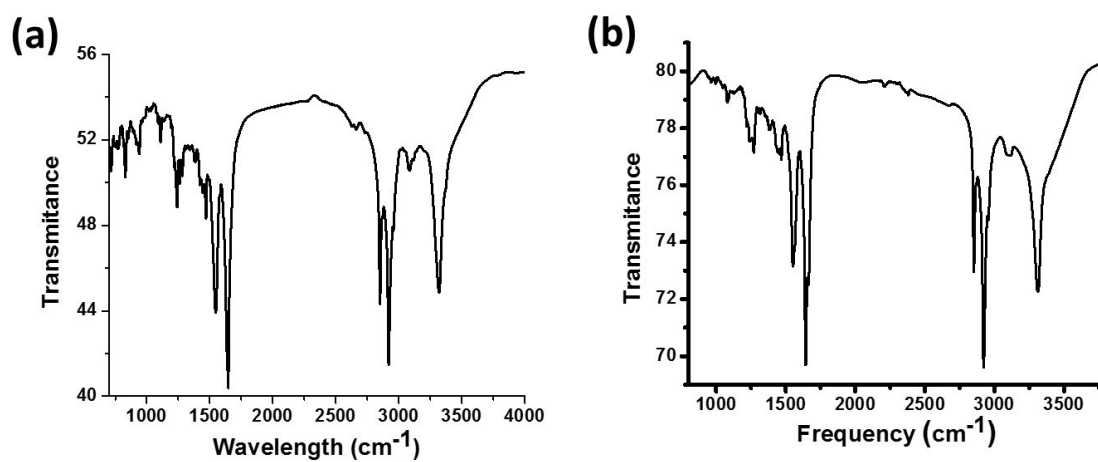

**Fig. S14** FT-IR spectra of (a) P1 Aggregate and (b) xerogel
